# Supplementary material
Source: PubMed Central journal article supplement (PMC3326475)
Supplement: 1118155109_pnas.201118155SI.pdf [file 1118155109_pnas.201118155SI.pdf]

# Supporting Information

Purtha et al. 10.1073/pnas.1118155109

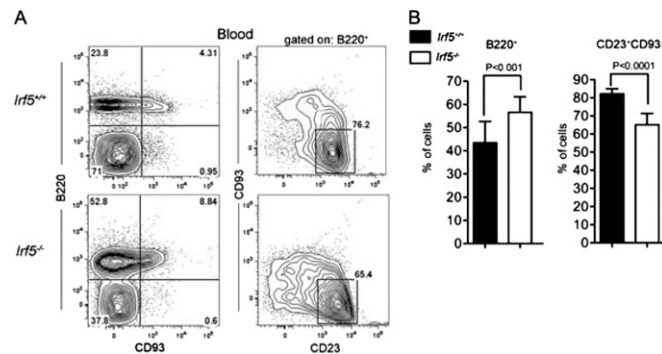

**Fig. S1.** Accumulation of immature B cells in blood from *lrf5*<sup>-/-</sup> mice. (A) Representative flow cytometry of immature B cells in the blood (B220<sup>+</sup>CD93<sup>+</sup>CD23<sup>-</sup>). (B) Frequency of B220<sup>+</sup> cells (Left) or mature B220<sup>+</sup>CD23<sup>+</sup>CD93<sup>-</sup> B cells (Right) in cells isolated from blood. Data shown are the mean and SD of three experiments with a total of six to eight mice. P values were determined by using an unpaired, two-tailed t test.

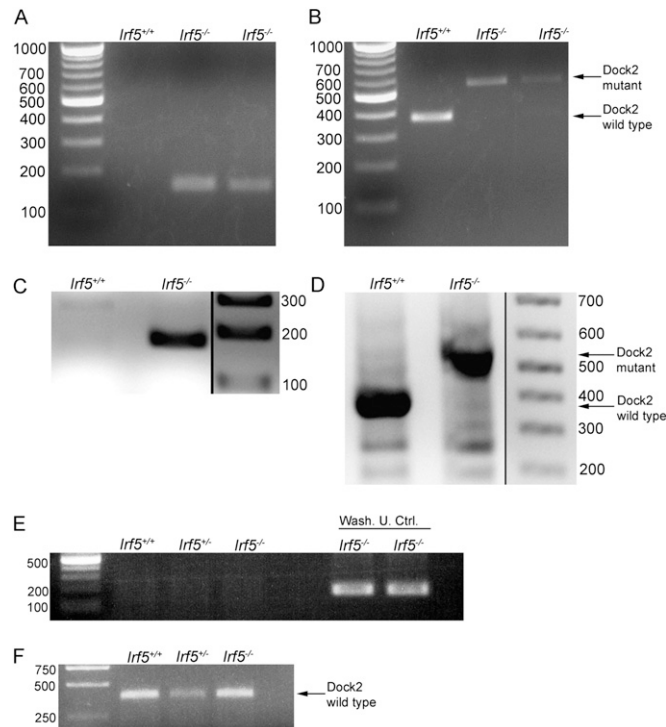

**Fig. S2.** Identification of mutation in *Dock2* in *lrf5*<sup>-/-</sup> mice from independent colonies. (A and B) PCR amplification of *Dock2* mutation by using mutant specific primers (A) or primers flanking the region of gene duplication (B) from cDNA generated from *lrf5*<sup>-/-</sup> mice bred at Boston University School of Medicine. (C and D) Genotyping PCR of cDNA generated from *lrf5*<sup>-/-</sup> maintained at Johns Hopkins University using primers specific to the *Dock2* mutation (C) or primers that span the region of mutation (D). (E and F) No PCR amplification of *Dock2* mutation from cDNA generated from mice bred at the University of Tokyo with mutant specific primers (E) but amplification of wild-type *Dock2* using spanning primers (F).

**Table S1. Independent segregation of developmental phenotype and *lrf5* genotype**

| Line                       | Phenotype (n = 11) | Normal (n = 28) |
|----------------------------|--------------------|-----------------|
| <i>lrf5</i> <sup>-/-</sup> | 3                  | 6               |
| <i>lrf5</i> <sup>+/-</sup> | 5                  | 12              |
| <i>lrf5</i> <sup>+/+</sup> | 3                  | 10              |

**Table S2. SNP mapping of mice with abnormal development**

| Chr. | mb position | BALB/c   | P5       | P8       | P23      | P25      | P40      | P44      | P55      | P58      | P69      | P73      | P63      |
|------|-------------|----------|----------|----------|----------|----------|----------|----------|----------|----------|----------|----------|----------|
| 11   | 5.68        | <i>A</i> | <i>T</i> | —        |
| 11   | 8.35        | <i>G</i> | <i>C</i> | <i>G</i> |
| 11   | 9.48        | <i>A</i> | <i>G</i> | —        |
| 11   | 12.19       | <i>G</i> | <i>A</i> | —        |
| 11   | 13.47       | <i>A</i> | <i>G</i> | —        |
| 11   | 16.18       | <i>T</i> | <i>C</i> | —        |
| 11   | 22.90       | <i>C</i> | <i>T</i> | Het      |
| 11   | 29.13       | <i>G</i> | <i>A</i> | —        |
| 11   | 30.06       | <i>T</i> | <i>C</i> | <i>T</i> |
| 11   | 35.14       | <i>G</i> | <i>A</i> |
| 11   | 35.92       | <i>G</i> | <i>C</i> | —        |
| 11   | 35.94       | <i>G</i> | <i>C</i> | —        |
| 11   | 38.68       | <i>C</i> | <i>A</i> |
| 11   | 39.78       | <i>T</i> | <i>A</i> |
| 11   | 41.00       | <i>G</i> | <i>T</i> | —        |
| 11   | 43.79       | <i>G</i> | <i>A</i> | <i>A</i> | <i>A</i> | Het      | <i>A</i> | <i>A</i> | <i>A</i> | <i>A</i> | <i>A</i> | Het      | —        |
| 11   | 46.67       | <i>A</i> | <i>C</i> | <i>C</i> | <i>C</i> | Het      | <i>C</i> | <i>C</i> | <i>C</i> | <i>C</i> | <i>C</i> | Het      | —        |
| 11   | 58.78       | <i>C</i> | <i>T</i> | <i>T</i> |          | Het      | <i>T</i> | Het      | <i>T</i> | <i>T</i> | <i>T</i> | Het      | —        |
| 11   | 63.34       | <i>G</i> | <i>T</i> | <i>T</i> |          | Het      | <i>T</i> | Het      | <i>T</i> | <i>T</i> | <i>T</i> | Het      | —        |
| 11   | 97.22       | <i>G</i> | Het      | Het      | Het      | <i>G</i> | Het      | <i>G</i> | Het      | <i>T</i> | <i>T</i> | <i>G</i> | —        |
| 11   | 116.74      | <i>T</i> | <i>T</i> | Het      | Het      | Het      | Het      | <i>T</i> | Het      | Het      | <i>G</i> | <i>T</i> | —        |

Italic type indicates BALB/c SNP; plain type indicates C57/BL6 SNP. Het, heterozygous.

**Table S3. SNP mapping of mice with normal development**

| Chr. | mb position | BALB/c   | P3       | P9       | P17      | P20      | P24      | P29      | P34 | P46      | P75      | P76      | — |
|------|-------------|----------|----------|----------|----------|----------|----------|----------|-----|----------|----------|----------|---|
| 11   | 5.68        | <i>A</i> | Het      | <i>A</i> | Het      | Het      | <i>A</i> | Het      | Het | <i>A</i> | Het      | <i>A</i> | — |
| 11   | 8.35        | <i>G</i> | Het      | <i>G</i> | Het      | Het      | <i>G</i> | Het      | Het | <i>G</i> | Het      | <i>G</i> | — |
| 11   | 9.48        | <i>A</i> | Het      | <i>A</i> | Het      | Het      | <i>A</i> | Het      | Het | <i>A</i> | Het      | <i>A</i> | — |
| 11   | 12.19       | <i>G</i> | Het      | <i>G</i> | Het      | Het      | <i>G</i> | Het      | Het | <i>G</i> | Het      | <i>G</i> | — |
| 11   | 13.47       | <i>A</i> | Het      | <i>A</i> | <i>A</i> | Het      | <i>A</i> | Het      | Het | <i>A</i> | Het      | <i>A</i> | — |
| 11   | 16.18       | <i>T</i> | Het      | <i>T</i> | <i>T</i> | Het      | <i>T</i> | Het      | Het | <i>T</i> | Het      | <i>T</i> | — |
| 11   | 22.90       | <i>C</i> | Het      | <i>C</i> | <i>C</i> | Het      | <i>C</i> | Het      | Het | <i>C</i> | Het      | <i>C</i> | — |
| 11   | 29.13       | <i>G</i> | Het      | <i>G</i> | <i>G</i> | Het      | Het      | Het      | Het | <i>G</i> | Het      | <i>G</i> | — |
| 11   | 30.06       | <i>T</i> | Het      | <i>T</i> | <i>T</i> | Het      | Het      | Het      | Het | <i>T</i> | Het      | <i>T</i> | — |
| 11   | 35.14       | <i>G</i> | Het      | <i>G</i> | <i>G</i> | Het      | Het      | Het      | Het | <i>G</i> | Het      | <i>G</i> | — |
| 11   | 35.92       | <i>G</i> | Het      | <i>G</i> | <i>G</i> | Het      | Het      | Het      | Het | <i>G</i> | Het      | <i>G</i> | — |
| 11   | 35.94       | <i>G</i> | Het      | <i>G</i> | <i>G</i> | Het      | Het      | Het      | Het | <i>G</i> | Het      | <i>G</i> | — |
| 11   | 38.68       | <i>C</i> | Het      | <i>C</i> | <i>C</i> | Het      | <i>A</i> | Het      | Het | <i>C</i> | Het      | <i>C</i> | — |
| 11   | 39.78       | <i>T</i> | Het      | <i>T</i> | <i>T</i> | Het      | <i>A</i> | Het      | Het | <i>T</i> | Het      | <i>T</i> | — |
| 11   | 41.00       | <i>G</i> | Het      | <i>G</i> | <i>G</i> | Het      | <i>T</i> | Het      | Het | <i>G</i> | Het      | <i>G</i> | — |
| 11   | 43.79       | <i>G</i> | Het      | <i>G</i> | <i>G</i> | Het      | <i>A</i> | Het      | Het | <i>G</i> | Het      | <i>G</i> | — |
| 11   | 46.67       | <i>A</i> | Het      | <i>A</i> | <i>A</i> | Het      | <i>C</i> | Het      | Het | <i>A</i> | Het      | Het      | — |
| 11   | 58.78       | <i>C</i> | <i>T</i> | <i>C</i> | <i>C</i> | Het      | <i>T</i> | Het      | Het | <i>C</i> | Het      | Het      | — |
| 11   | 63.34       | <i>G</i> | <i>T</i> | <i>G</i> | <i>G</i> | Het      | <i>T</i> | Het      | Het | Het      | Het      | Het      | — |
| 11   | 97.22       | <i>G</i> | <i>T</i> | <i>G</i> | <i>G</i> | Het      | <i>T</i> | Het      | Het | Het      | <i>T</i> | <i>T</i> | — |
| 11   | 116.74      | <i>T</i> | <i>G</i> | <i>T</i> | <i>T</i> | <i>T</i> | <i>G</i> | <i>T</i> | Het | Het      | <i>G</i> | <i>G</i> | — |

Italic type indicates BALB/c SNP; plain type indicates C57/BL6 SNP. Het, heterozygous.
